# Supplementary figures and images for: A scoping review protocol to map the research foci trends in tobacco control over the last decade
Source: HighWire-hosted journal article supplement (doi:10.1136/bmjopen-2014-006643), 2015-01-01

Appendix B

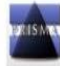

Figure 1.0 PRISMA 2009 Flow Diagram (19)

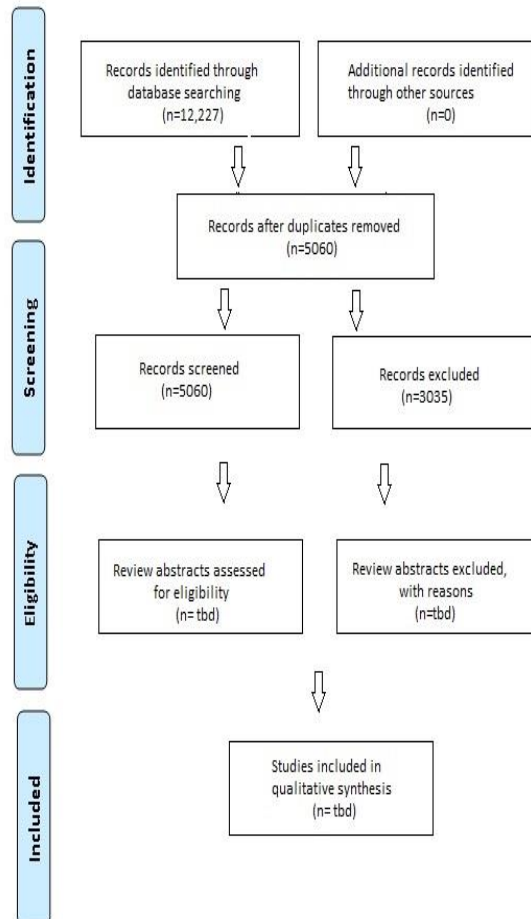

Supplement: bmjopen-2014-006643supp_appendixB.pdf [file bmjopen-2014-006643supp_appendixB.pdf]
